# Supplementary material for: An examination of changes in autumn Eurasian snow cover and its relationship with the winter Arctic Oscillation using 20th Century Reanalysis version 3
Source: Copernicus journal article supplement (doi:10.5194/tc-19-663-2025), 2025-02-11
Supplement: Supplementary file 1 [file tc-19-663-2025-supplement.pdf]

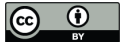

*Supplement of*

**An examination of changes in autumn Eurasian snow cover and its relationship with the winter Arctic Oscillation using 20th Century Reanalysis version 3**

**Gareth J. Marshall**

*Correspondence to:* Gareth J. Marshall (gjma@bas.ac.uk)

The copyright of individual parts of the supplement might differ from the article licence.

## Supplementary Material

**Table S1.** Details of the 133 meteorological stations from which daily snow depth data were used to define snow onset. Data availability is the proportion of years for which snow onset can be calculated.

| WMO Number | Station Name       | Latitude (°N) | Longitude (°E) | Elevation (m a.s.l.) | Data availability: 2003-2022 (%) | Data availability: 1966-2022 (%) |
|------------|--------------------|---------------|----------------|----------------------|----------------------------------|----------------------------------|
| 20674      | Ostrov Dikson      | 73.50         | 80.40          | 42                   | 100.0                            | 100.0                            |
| 20891      | Hatanga            | 71.98         | 102.47         | 31                   | 100.0                            | 100.0                            |
| 21946      | Chokurdah          | 70.62         | 147.88         | 44                   | 100.0                            | 100.0                            |
| 22113      | Murmansk           | 68.97         | 33.05          | 57                   | 100.0                            | 100.0                            |
| 22217      | Kandalaksa         | 67.15         | 32.35          | 26                   | 100.0                            | 100.0                            |
| 22550      | Arkhangelsk        | 64.50         | 40.73          | 8                    | 100.0                            | 98.2                             |
| 22583      | Kojnas             | 64.75         | 47.65          | 63                   | 100.0                            | 100.0                            |
| 22602      | Reboly             | 63.83         | 30.82          | 180                  | 100.0                            | 100.0                            |
| 22641      | Onega              | 63.90         | 38.12          | 11                   | 100.0                            | 100.0                            |
| 22802      | Sortavala          | 61.72         | 30.72          | 17                   | 100.0                            | 98.2                             |
| 22820      | Petrozavodsk       | 61.82         | 34.27          | 112                  | 100.0                            | 100.0                            |
| 22837      | Vytegra            | 61.02         | 36.45          | 55                   | 100.0                            | 100.0                            |
| 22887      | Kotlas             | 61.27         | 46.72          | 55                   | 100.0                            | 100.0                            |
| 23205      | Nar'Jan-Mar        | 67.63         | 53.03          | 10                   | 100.0                            | 100.0                            |
| 23405      | Ust'-Cil'Ma        | 65.43         | 52.27          | 78                   | 100.0                            | 100.0                            |
| 23418      | Pechora            | 65.12         | 57.10          | 53                   | 100.0                            | 100.0                            |
| 23472      | Turuhansk          | 65.78         | 87.93          | 38                   | 100.0                            | 100.0                            |
| 23527      | Saran-Paul         | 64.28         | 60.88          | 28                   | 100.0                            | 96.5                             |
| 23552      | Tarko-Sale         | 64.92         | 77.82          | 26                   | 100.0                            | 98.2                             |
| 23631      | Berezovo           | 63.93         | 65.05          | 27                   | 100.0                            | 100.0                            |
| 23678      | Verhneimbatsk      | 63.15         | 87.95          | 46                   | 100.0                            | 100.0                            |
| 23711      | Troicko-Pechorskoe | 62.70         | 56.20          | 134                  | 95.0                             | 98.2                             |
| 23724      | Njaksimvol'        | 62.43         | 60.87          | 50                   | 100.0                            | 100.0                            |
| 23734      | Oktjabr'Skoe       | 62.75         | 66.05          | 70                   | 100.0                            | 98.2                             |
| 23804      | Syktvykar          | 61.68         | 50.78          | 116                  | 100.0                            | 100.0                            |
| 23884      | Bor                | 61.60         | 90.02          | 62                   | 100.0                            | 100.0                            |
| 23891      | Bajkit             | 61.67         | 96.37          | 256                  | 100.0                            | 100.0                            |
| 23921      | Ivdel              | 60.68         | 60.45          | 93                   | 100.0                            | 100.0                            |
| 23933      | Hanty-Mansijsk     | 61.02         | 69.03          | 44                   | 100.0                            | 100.0                            |
| 23955      | Aleksandrovskoe    | 60.43         | 77.87          | 47                   | 100.0                            | 100.0                            |
| 23966      | Vanzil'-Kynak      | 60.35         | 84.08          | 98                   | 100.0                            | 100.0                            |
| 24125      | Olenek             | 68.50         | 112.43         | 217                  | 95.0                             | 98.2                             |
| 24266      | Verhojansk         | 67.57         | 133.40         | 136                  | 100.0                            | 100.0                            |
| 24343      | Zhigansk           | 66.77         | 123.40         | 88                   | 100.0                            | 98.2                             |
| 24507      | Tura               | 64.27         | 100.23         | 205                  | 100.0                            | 100.0                            |
| 24639      | Njurba             | 63.28         | 118.33         | 117                  | 100.0                            | 98.2                             |
| 24641      | Viljujsk           | 63.78         | 121.62         | 111                  | 100.0                            | 100.0                            |
| 24671      | Tompo              | 63.95         | 135.87         | 399                  | 100.0                            | 93.0                             |
| 24688      | Ojmjakon           | 63.25         | 143.15         | 740                  | 100.0                            | 100.0                            |
| 24738      | Suntar             | 62.15         | 117.65         | 131                  | 100.0                            | 100.0                            |
| 24768      | Churapca           | 62.03         | 132.60         | 181                  | 100.0                            | 98.2                             |
| 24817      | Erbogacen          | 61.27         | 108.02         | 284                  | 100.0                            | 100.0                            |
| 24908      | Vanavara           | 60.33         | 102.27         | 259                  | 100.0                            | 100.0                            |
| 24923      | Lensk              | 60.72         | 114.88         | 241                  | 100.0                            | 98.2                             |
| 24944      | Olekminsk          | 60.40         | 120.42         | 225                  | 100.0                            | 100.0                            |
| 24951      | Isit               | 60.82         | 125.32         | 123                  | 100.0                            | 98.2                             |
| 24959      | Yakutsk            | 62.02         | 129.72         | 98                   | 100.0                            | 98.2                             |
| 24966      | Ust'-Maja          | 60.38         | 134.45         | 169                  | 100.0                            | 100.0                            |
| 24982      | Uyega              | 60.72         | 142.78         | 396                  | 100.0                            | 98.2                             |
| 25551      | Markovo            | 64.68         | 170.42         | 25                   | 100.0                            | 100.0                            |
| 25563      | Anadyr'            | 64.78         | 177.57         | 64                   | 100.0                            | 100.0                            |
| 25703      | Sejmchan           | 62.92         | 152.42         | 206                  | 100.0                            | 100.0                            |
| 25913      | Magadan            | 59.55         | 150.78         | 115                  | 100.0                            | 100.0                            |
| 26063      | St. Petersburg     | 59.97         | 30.30          | 3                    | 95.0                             | 98.2                             |
| 26477      | Velikie Luki       | 56.35         | 30.62          | 97                   | 95.0                             | 98.2                             |
| 26781      | Smolensk           | 54.75         | 32.07          | 236                  | 100.0                            | 100.0                            |

| WMO Number | Station Name              | Latitude (°N) | Longitude (°E) | Elevation (m a.s.l.) | Data availability: 2003-2022 (%) | Data availability: 1966-2022 (%) |
|------------|---------------------------|---------------|----------------|----------------------|----------------------------------|----------------------------------|
| 27037      | Vologda                   | 59.32         | 39.92          | 125                  | 100.0                            | 100.0                            |
| 27333      | Kostroma                  | 57.77         | 40.85          | 125                  | 100.0                            | 98.2                             |
| 28064      | Leusi                     | 59.62         | 65.72          | 70                   | 100.0                            | 100.0                            |
| 28138      | Biser                     | 58.52         | 58.85          | 463                  | 100.0                            | 100.0                            |
| 28144      | Verhotur'E                | 58.87         | 60.78          | 124                  | 100.0                            | 98.2                             |
| 28240      | Nizhny Tagil              | 57.88         | 60.07          | 262                  | 100.0                            | 96.5                             |
| 28255      | Turinsk                   | 58.05         | 63.68          | 101                  | 90.0                             | 94.7                             |
| 28275      | Tobol'sk                  | 58.15         | 68.25          | 45                   | 100.0                            | 100.0                            |
| 28367      | Tyumen                    | 57.12         | 65.43          | 101                  | 100.0                            | 98.2                             |
| 28411      | Izhevsk                   | 56.83         | 53.45          | 155                  | 100.0                            | 100.0                            |
| 28434      | Krasnoufimsk              | 56.65         | 57.78          | 205                  | 100.0                            | 100.0                            |
| 28440      | Ekaterinburg              | 56.83         | 60.63          | 280                  | 100.0                            | 100.0                            |
| 28493      | Tara                      | 56.90         | 74.38          | 73                   | 100.0                            | 100.0                            |
| 28661      | Kurgan                    | 55.47         | 65.40          | 73                   | 100.0                            | 98.2                             |
| 28698      | Omsk                      | 55.00         | 73.40          | 121                  | 100.0                            | 98.2                             |
| 28722      | Ufa                       | 54.72         | 55.83          | 104                  | 100.0                            | 100.0                            |
| 28900      | Samara                    | 53.25         | 50.22          | 136                  | 100.0                            | 100.0                            |
| 28952      | Kostanay                  | 53.21         | 63.61          | 170                  | 100.0                            | 100.0                            |
| 29023      | Napas                     | 59.85         | 81.95          | 77                   | 100.0                            | 98.2                             |
| 29111      | Sredny Vasyugan           | 59.20         | 78.20          | 68                   | 100.0                            | 100.0                            |
| 29231      | Kolpasevo                 | 58.30         | 82.95          | 73                   | 100.0                            | 100.0                            |
| 29263      | Jenisseisk                | 58.45         | 92.10          | 77                   | 100.0                            | 100.0                            |
| 29282      | Bogucany                  | 58.38         | 97.45          | 131                  | 100.0                            | 100.0                            |
| 29313      | Pudino                    | 57.57         | 79.43          | 96                   | 100.0                            | 100.0                            |
| 29328      | Bakchar                   | 57.00         | 82.07          | 109                  | 100.0                            | 100.0                            |
| 29430      | Tomsk                     | 56.50         | 84.92          | 141                  | 100.0                            | 100.0                            |
| 29612      | Barabinsk                 | 55.33         | 78.37          | 119                  | 100.0                            | 100.0                            |
| 29698      | Nizne-Udinsk              | 54.88         | 99.03          | 410                  | 100.0                            | 100.0                            |
| 29807      | Irtysk                    | 53.35         | 75.45          | 94                   | 100.0                            | 100.0                            |
| 29838      | Barnaul                   | 53.40         | 83.50          | 183                  | 100.0                            | 100.0                            |
| 29866      | Minusinsk                 | 53.70         | 91.70          | 254                  | 100.0                            | 100.0                            |
| 30028      | Ika                       | 59.28         | 106.17         | 350                  | 100.0                            | 100.0                            |
| 30054      | Vitim                     | 59.45         | 112.58         | 186                  | 100.0                            | 100.0                            |
| 30230      | Kirensk                   | 57.77         | 108.07         | 257                  | 100.0                            | 100.0                            |
| 30372      | Chara                     | 56.90         | 118.27         | 709                  | 95.0                             | 98.2                             |
| 30393      | Cul'Man                   | 56.83         | 124.87         | 855                  | 100.0                            | 100.0                            |
| 30521      | Zhigalovo                 | 54.80         | 105.17         | 417                  | 100.0                            | 100.0                            |
| 30555      | Troickij Priisk           | 54.60         | 113.10         | 1315                 | 90.0                             | 91.2                             |
| 30636      | Barguzin                  | 53.60         | 109.60         | 488                  | 100.0                            | 98.2                             |
| 30673      | Mogocha                   | 53.75         | 119.73         | 624                  | 100.0                            | 100.0                            |
| 30692      | Skovorodino               | 54.00         | 123.97         | 397                  | 90.0                             | 93.0                             |
| 30710      | Irkutsk                   | 52.27         | 104.35         | 467                  | 100.0                            | 100.0                            |
| 30758      | Chita                     | 52.08         | 113.48         | 671                  | 100.0                            | 93.0                             |
| 30777      | Sretensk                  | 52.23         | 117.70         | 528                  | 100.0                            | 100.0                            |
| 30823      | Ulan-Ude                  | 51.83         | 107.60         | 514                  | 100.0                            | 100.0                            |
| 30925      | Kjahta                    | 50.37         | 106.45         | 791                  | 95.0                             | 98.2                             |
| 30965      | Borzya                    | 50.40         | 116.52         | 675                  | 95.0                             | 98.2                             |
| 31004      | Aldan                     | 58.62         | 125.03         | 678                  | 100.0                            | 98.2                             |
| 31088      | Ohotsk                    | 59.37         | 143.20         | 5                    | 100.0                            | 98.2                             |
| 31168      | Ayan                      | 56.45         | 138.15         | 6                    | 100.0                            | 100.0                            |
| 31253      | Bomnak                    | 54.72         | 128.87         | 365                  | 100.0                            | 98.2                             |
| 31329      | Ekimchan                  | 53.08         | 132.98         | 540                  | 100.0                            | 100.0                            |
| 31369      | Nikolaevsk-Na-Amure       | 53.13         | 140.70         | 67                   | 100.0                            | 96.5                             |
| 31388      | Norsk                     | 52.40         | 129.90         | 207                  | 100.0                            | 100.0                            |
| 31416      | Im Poliny Osipenko        | 52.42         | 136.50         | 69                   | 100.0                            | 100.0                            |
| 31510      | Blagovesetn'sk            | 50.25         | 127.50         | 130                  | 100.0                            | 100.0                            |
| 31532      | Cekunda                   | 50.80         | 132.20         | 271                  | 100.0                            | 100.0                            |
| 32061      | Aleksandrovsk-Sahalinskij | 50.90         | 142.17         | 30                   | 100.0                            | 100.0                            |
| 32389      | Kljuchi                   | 56.32         | 160.83         | 28                   | 100.0                            | 98.2                             |
| 33345      | Kyiv                      | 50.40         | 30.57          | 167                  | 95.0                             | 94.7                             |

| WMO Number | Station Name       | Latitude (°N) | Longitude (°E) | Elevation (m a.s.l.) | Data availability: 2003-2022 (%) | Data availability: 1966-2022 (%) |
|------------|--------------------|---------------|----------------|----------------------|----------------------------------|----------------------------------|
| 34163      | Oktyabrsky Gorodok | 51.63         | 45.45          | 202                  | 100.0                            | 100.0                            |
| 34391      | Aleksandrov-Gaj    | 50.15         | 48.55          | 23                   | 100.0                            | 100.0                            |
| 35078      | Atbasar            | 51.82         | 68.37          | 304                  | 100.0                            | 100.0                            |
| 35108      | Uraisk             | 51.15         | 51.28          | 37                   | 100.0                            | 100.0                            |
| 35121      | Orenburg           | 51.68         | 55.10          | 115                  | 100.0                            | 100.0                            |
| 35188      | Astana             | 51.13         | 71.37          | 350                  | 100.0                            | 100.0                            |
| 35229      | Aktjubinsk         | 50.28         | 57.15          | 219                  | 100.0                            | 100.0                            |
| 36034      | Rubcovsk           | 51.58         | 81.22          | 216                  | 100.0                            | 100.0                            |
| 36177      | Semipalatinsk      | 50.42         | 80.30          | 196                  | 100.0                            | 100.0                            |

**Table S2.** Proportion of 21-year running means that the 20CRv3 SC indices have positive and negative correlations with the 20CRv3 AO, and the proportion that are statistically significant based on a one-tailed test ( $p < 0.10$ ). The significance of the proportion of decades with a significant SC-AO correlation is determined based on a probability distribution function derived from 10000 scrambled AO time-series using a one-tailed test for each sign of correlation: \*\*\* is  $p < 0.01$ , \*\* is  $p < 0.05$ , \* is  $p < 0.10$ . The period covered is 1831-51 to 1995-2015.

| Snow Cover Index | Positive (%) | Negative (%) | Pos. (significant) (%) | Neg. (significant) (%) |
|------------------|--------------|--------------|------------------------|------------------------|
| SCI_09           | 19.50        | 80.50        | 0.00**                 | 37.74***               |
| SCI_10           | 48.82        | 51.18        | 1.89                   | 30.19**                |
| SCI_11           | 57.23        | 42.77        | 14.47                  | 8.18                   |
| SAI_OCT          | 69.18        | 30.82        | 12.58                  | 5.66                   |
| SAI_NOV          | 48.43        | 51.57        | 1.89                   | 0.63*                  |

**Table S3.** Proportion of 21-year running means that various SC indices derived from 20CRv3 have positive and negative correlations with the 20CRv3 AO, and the proportion that are statistically significant based on a one-tailed test ( $p < 0.10$ ). SCI\_09 NE and SCI\_11 SW developed in this study, the SAI\_OCR\_CJ index of Cohen and Jones (2011) and Nov\_SNOWI defined in Han and Sun (2018). The significance of the proportion of decades with a significant SC-AO correlation is determined based on a probability distribution function derived from 10000 scrambled AO time-series using a one-tailed test for each sign of correlation: \*\*\* is  $p < 0.01$ , \*\* is  $p < 0.05$ , \* is  $p < 0.10$ . The period covered is 1831-40 to 2006-2015.

| Snow Cover Index | Positive (%) | Negative (%) | Pos. (significant) (%) | Neg. (significant) (%) |
|------------------|--------------|--------------|------------------------|------------------------|
| SCI_09_NE        | 6.92         | 93.08        | 0.00**                 | 32.70**                |
| SCI_11_SW        | 89.94        | 10.06        | 41.51***               | 0.00**                 |
| SAI_OCT_CJ       | 59.12        | 40.88        | 12.58                  | 11.32                  |
| Nov_SNOWI        | 14.47        | 85.53        | 0.62*                  | 42.13***               |
| Nov_SNOWI (west) | 86.16        | 13.84        | 41.51***               | 0.00**                 |
| Nov_SNOWI (east) | 31.45        | 68.55        | 4.40                   | 27.67**                |

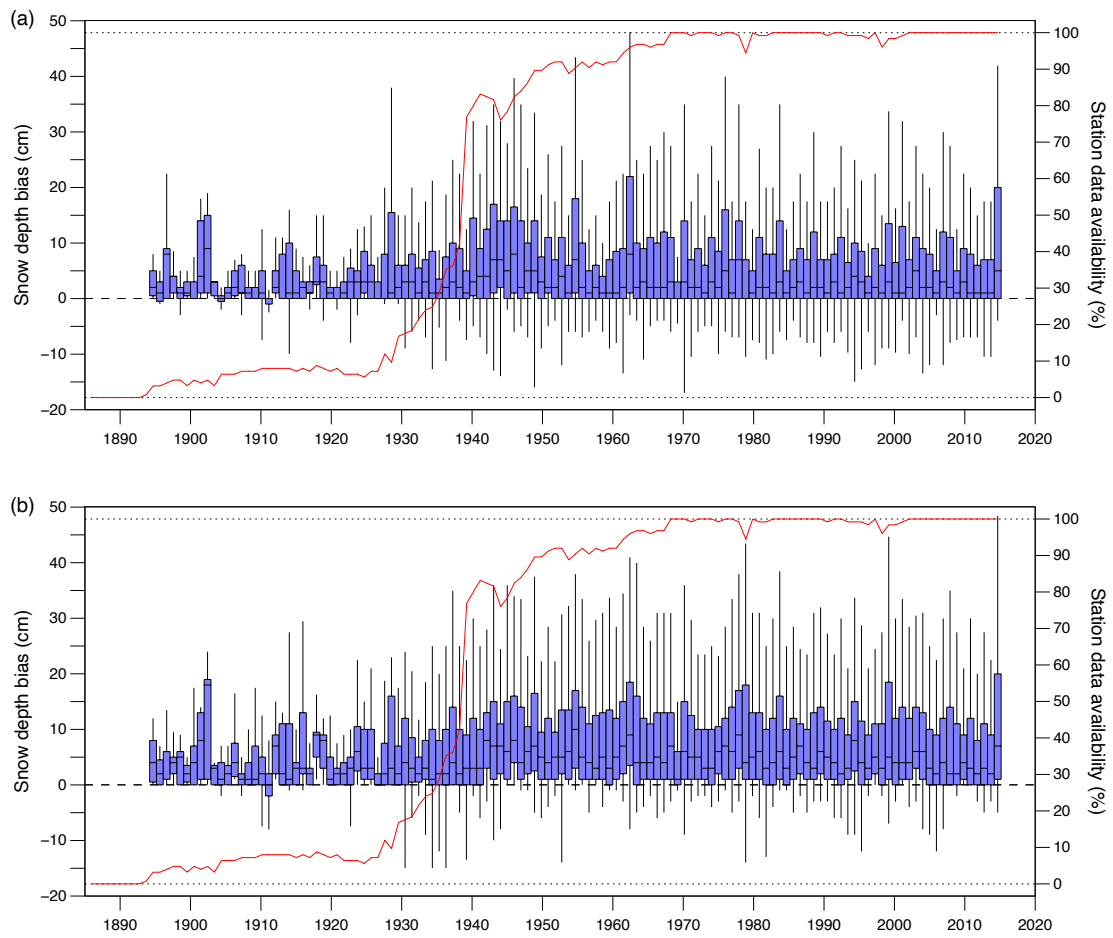

**Figure S1.** Bias of the median October-November snow depth in (a) 20CRv2c and (b) 20CRv3. The black horizontal line represents the median bias, the blue boxes show the interquartile range in the bias and the whiskers the larger (smaller) of either the upper (lower) quartile plus (minus) 1.5 times the interquartile range or maximum (minimum) value. The red line is the proportion of the 125 in situ station measurements available for comparison.

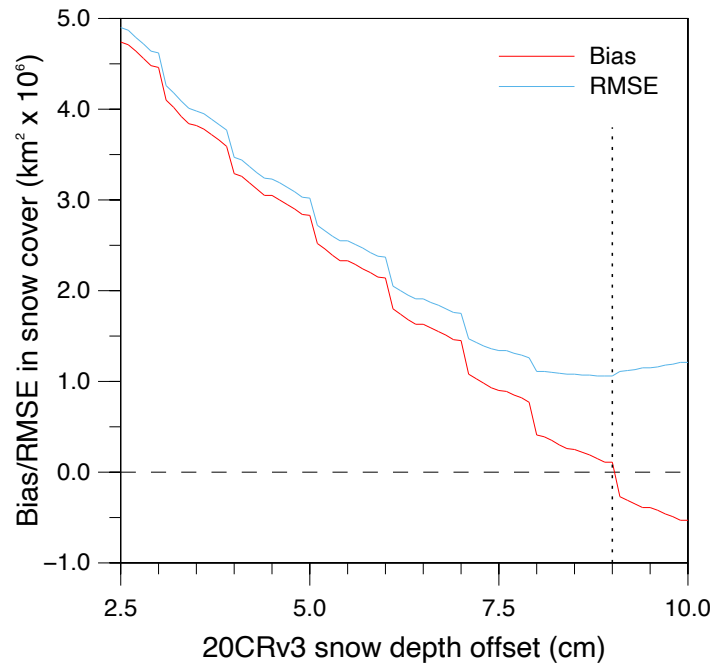

**Figure S2.** Relationship between the bias and RMSE in Eurasian SC in ERA5 (red) versus 20CRv3 (blue) for the calibration period (2003-2015). The vertical dotted line is where the bias is closest to zero and the RMSE is smallest (an offset of 9.0 cm).

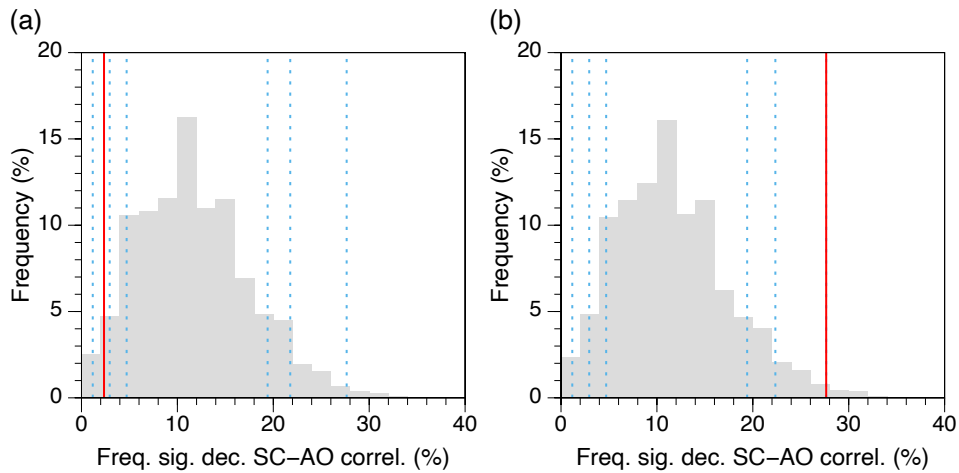

**Figure S3.** Probability distribution functions of the frequency of statistically significant ( $p < 0.10$ ) decadal SCI\_09-AO correlations based on 10000 scrambled AO time-series for (a) positive and (b) negative relationships. The dashed blue lines represent the values of statistical significance ( $p < 0.10$ ,  $p < 0.05$ ,  $p < 0.01$ ) for high and low values. The red line is the value derived from the 20CRv3 data.

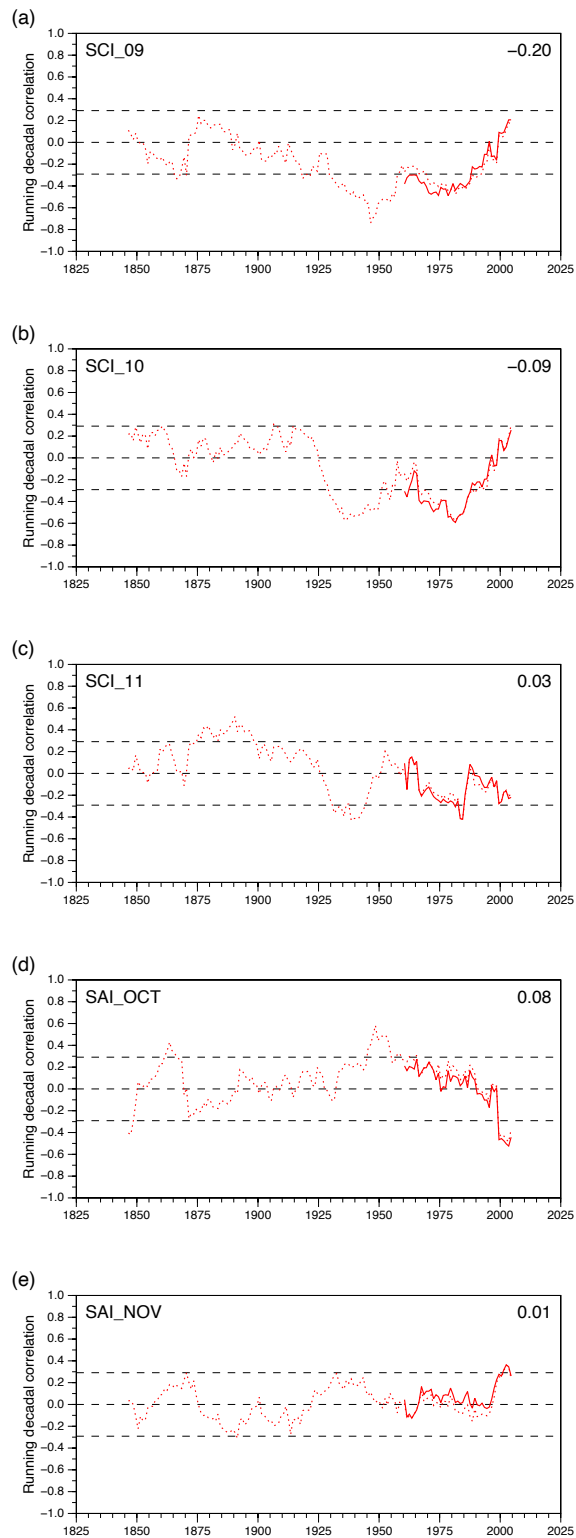

**Figure S4.** Running 21-year correlations between snow cover indices and winter AO: (a) SCI\_09; (b) SCI\_10; (c) SCI\_11; (d) SAI\_OCT; (e) SAI\_NOV. Correlations with winter AO from the CPC and derived from 20CRV3 are shown as full and dashed lines, respectively. The black dashed horizontal lines indicate significance levels at  $p < 0.10$  based on a one-tailed test for each sign of correlation for each period considered independently. The figure in the top right corner is the mean correlation coefficient across all 21-year periods.



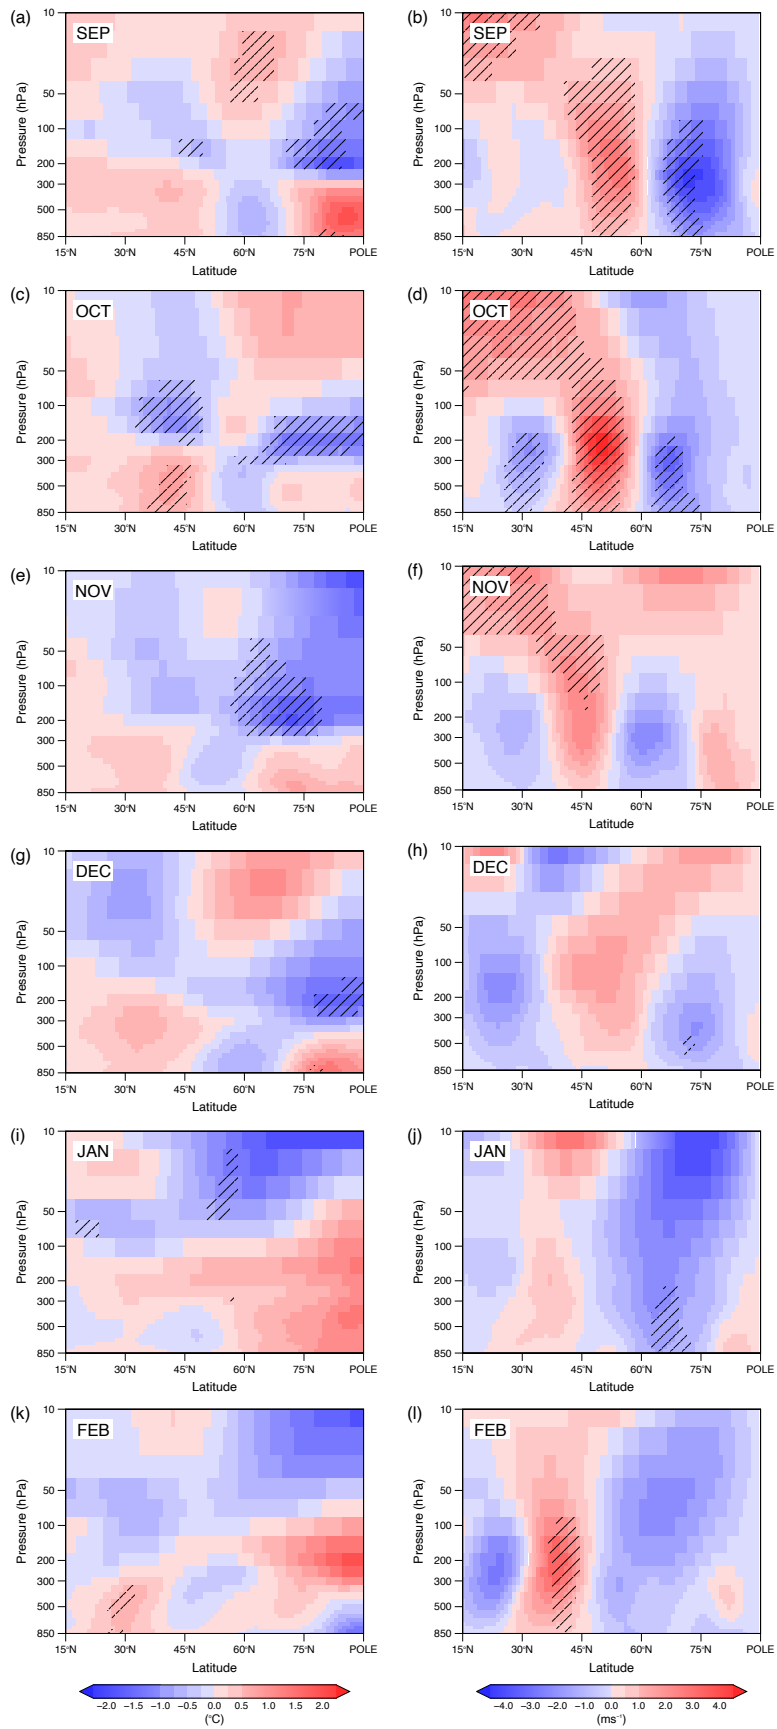

**Figure S5.** Difference in zonal mean temperature (left) and zonal mean zonal wind (right), between years with marked positive and negative values of the normalised SCI\_09 NE index (above 1.0 and below -1.0, respectively). Data for 1966-2014 derived from 20CRv3. Hatched shading denotes a significant relationship at  $p < 0.10$ .
